# Supplementary material for: Silver Nanoparticles Synthesized through Green Methods UsingEscherichia coliTop 10 (Ec-Ts) Growth Culture Medium Exhibit Antimicrobial Properties against Nongrowing Bacterial Strains
Source: Hindawi journal article supplement (doi:10.1155/2019/4637325), 2019-02-12
Supplement: f1 [file 4637325.f1.pdf]

# **Silver Nanoparticles Synthesized through Green Methods Using *Escherichia coli* Top 10 (Ec-Ts) Growth Culture Medium Exhibit Antimicrobial Properties Against Non-Growing Bacterial Strains**

*Esther Baltazar Encarnación<sup>1,2,‡</sup>, Carlos E. Escárcega-González<sup>1,2,‡</sup>, Ximena G. Vasto-Anzaldo<sup>3</sup>,  
María Elena Cantú-Cárdenas<sup>1,2</sup> and J. Rubén Morones-Ramírez<sup>1,2\*</sup>*

- 1 Universidad Autónoma de Nuevo León, UANL. Facultad de Ciencias Químicas. Av. Universidad s/n, Cd. Universitaria, 66451, San Nicolás de los Garza, NL, México.
- 2 Centro de Investigación en Biotecnología y Nanotecnología, Facultad de Ciencias Químicas, Universidad Autónoma de Nuevo León. Parque de Investigación e Innovación Tecnológica, Km. 10 autopista al Aeropuerto Internacional Mariano Escobedo, Apodaca, Nuevo Leon. 66629
- 3 Universidad Autónoma de Nuevo León, UANL. Facultad de Ciencias Biológicas. Av. Universidad s/n, Cd. Universitaria, 66451, San Nicolás de los Garza, NL, México.

‡ Authors Contributed Equally

[\*] Corresponding Author:

Facultad de Ciencias Químicas, Universidad Autónoma de Nuevo León, Pedro de Alba, S/N, San Nicolás de los Garza, Nuevo León, México.

E-mail: [jose.moronesrmr@uanl.edu.mx](mailto:jose.moronesrmr@uanl.edu.mx), [morones.ruben@gmail.com](mailto:morones.ruben@gmail.com)

Tel: +52-1-818-329-4000 Ext. 6295

*Supplementary Material*

*Estimation of the Ag-NPs concentrations used in the antimicrobial activity assay*

From the known concentrations of Ag, the concentration of the Ag-NPs are obtained:

1) For 15 $\mu$ M of Ag:

a) No. of atoms of Ag:  $1.5 \times 10^{-5} M_{\text{Ag}} \times 6.022 \times 10^{23} =$

**$9.03 \times 10^{18}$**  atoms of Ag

b) No. of atoms/Ag-NPs:  $V = 4/3\pi(D/2)^3 = 4/3\pi(10.6\text{nm}/2)^3 = 623.6\text{nm}^3 =$

$6.236 \times 10^{-19} \text{cm}^3$ .  $\rho_{\text{Ag}} = 10.5 \text{gr/cm}^3$

$(6.236 \times 10^{-19} \text{cm}^3) (10.5 \text{gr/cm}^3) = 6.54 \times 10^{-18} \text{gr}$

$6.54 \times 10^{-18} \text{gr} (6.022 \times 10^{23}) / 107.87 \text{gr} \cdot \text{mol}_{\text{Ag}} =$

**$36511$**  atoms of Ag/Ag-NPs.

c) No. of Ag-NPs:  $9.03 \times 10^{18} \text{atoms of Ag} / 36511 \text{atoms of Ag/Ag-NPs} =$

**$2.47 \times 10^{14}$**  Ag-NPs.

d) Moles/ $L_{\text{Ag-NPs}}$ :  $2.47 \times 10^{14} \text{Ag-NPs} / 6.022 \times 10^{23} =$

**$4.1 \times 10^{-10} \text{M}/L_{\text{Ag-NPs}}$**

2) For 30 $\mu$ M of Ag:  $4.1 \times 10^{-10} \times 2 =$

**$8.2 \times 10^{-10} \text{M}/L_{\text{Ag-NPs}}$**

3) For 60 $\mu$ M of Ag:  $4.1 \times 10^{-10} \times 4 =$

**$1.6 \times 10^{-9} \text{M}/L_{\text{Ag-NPs}}$**
